# Supplementary material
Source: publisher figshare collection journal article supplement (https://tandf.figshare.com/articles/dataset/_/21571840)
Supplement: Supplementary file 1 [file 1]

# Supplemental file 2

*Variable grouping (impairments, sports and cooling strategies)*

---

## **Article title**

Heat preparedness and exertional heat illness in Paralympic athletes: A Tokyo 2020 survey

## **Authors**

Puck Alkemade<sup>1</sup>, Hein A. M. Daanen<sup>1</sup>, Thomas W. J. Janssen<sup>1</sup>, Elizabeth Broad<sup>2</sup>, Victoria L. Goosey-Tolfrey<sup>3</sup>, Tatsuru Ibusuki<sup>4</sup>, Hiske Kneepkens<sup>5</sup>, Julien D. Périard<sup>6</sup>, Thijs M. H. Eijsvogels<sup>7</sup>

## **Corresponding author**

Puck Alkemade, [puckalkemade@gmail.com](mailto:puckalkemade@gmail.com)

## **Author affiliations**

<sup>1</sup>Faculty of Behavioural and Movement Sciences, Vrije Universiteit Amsterdam, Amsterdam Movement Sciences, Amsterdam, The Netherlands.

<sup>2</sup>Freelance Sports Dietitian, Huskisson, Australia.

<sup>3</sup>Peter Harrison Centre for Disability Sport, School of Sport, Exercise and Health Sciences, Loughborough University, Loughborough, Leicestershire LE11 3TU, UK.

<sup>4</sup>Department of Rehabilitation Medicine, Akeno Central Hospital, Oita, Japan.

<sup>5</sup>Sport Medisch Centrum Papendal, NOC\*NSF, Arnhem, The Netherlands.

<sup>6</sup>University of Canberra Research Institute for Sport and Exercise, Bruce, Australia.

<sup>7</sup>Radboud Institute for Health Sciences, Department of Physiology, Radboud University Medical Center, Nijmegen, The Netherlands.

**Table 1** Impairments of respondents, including categories.

| <b>Impairment</b> ►                           | <b>n</b> | <b>Category</b>           |
|-----------------------------------------------|----------|---------------------------|
| Other (please specify)                        | 30       | Multiple                  |
| Spinal cord injury                            | 17       | SCI                       |
| Amputation resulting from trauma              | 13       | Limb deficiency           |
| Congenital limb deficiency (present at birth) | 12       | Limb deficiency           |
| Intellectual retardation                      | 7        | Visual/Intellectual/Pilot |
| Brain injury                                  | 3        | Other                     |
| Stroke                                        | 3        | Other                     |
| Arthrogryposis                                | 2        | Other                     |
| Brachial plexus injury                        | 2        | Other                     |
| Cerebral palsy                                | 2        | Other                     |
| Macular degeneration                          | 2        | Visual/Intellectual/Pilot |
| Multiple sclerosis                            | 2        | Other                     |
| Tunnel vision                                 | 2        | Visual/Intellectual/Pilot |
| Ankylosis                                     | 1        | Other                     |
| Autism Spectrum Disorders                     | 1        | Visual/Intellectual/Pilot |
| Congenital cataract                           | 1        | Visual/Intellectual/Pilot |
| Guillain-Barré syndrome                       | 1        | Other                     |
| Muscular dystrophy                            | 1        | Other                     |
| Myopia                                        | 1        | Visual/Intellectual/Pilot |
| Polio                                         | 1        | Other                     |
| Retinitis pigmentosa                          | 1        | Visual/Intellectual/Pilot |
| Spina bifida                                  | 1        | SCI                       |

► Impairments selected from multiple-choice list

**Table 2** Sports performed by respondents, including environment and category, and specific disciplines where appropriate.

| <b>Sports<sup>a</sup></b> | <b>n</b> | <b>Environment</b>            | <b>Category</b>                  | <b>Disciplines</b>                                                                                                                                                                       |
|---------------------------|----------|-------------------------------|----------------------------------|------------------------------------------------------------------------------------------------------------------------------------------------------------------------------------------|
| Athletics                 | 29       | Outdoor                       | Endurance (n=11)<br>Power (n=18) | 100m (n=8); 1500m (n=8);<br>Long jump (n=7); Marathon<br>(n=5); 400m (n=6); Javelin (n=3);<br>200m (n=3); 5000m (n=3);<br>Universal relay 4x100m (n=2);<br>Club throw (n=1); 800m (n=1). |
| Swimming                  | 16       | Indoor                        | Power                            | Distances (various strokes):<br>100m (n=23); 200m (n=8);<br>50m (n=6); 400m (n=4).                                                                                                       |
| Wheelchair<br>basketball  | 11       | Indoor                        | Mixed                            |                                                                                                                                                                                          |
| Cycling                   | 8        | Indoor (n=1)<br>Outdoor (n=7) | Endurance (n=7)<br>Power (n=1)   | Road race (n=7);<br>Road time trial (n=7);<br>Track 500m time trial (n=2);<br>Track individual pursuit (n=2).                                                                            |
| Rowing                    | 7        | Outdoor                       | Endurance                        |                                                                                                                                                                                          |
| Sitting volleyball        | 6        | Indoor                        | Mixed                            |                                                                                                                                                                                          |
| Equestrian                | 4        | Outdoor                       | Skill                            |                                                                                                                                                                                          |
| Wheelchair tennis         | 4        | Outdoor <sup>*</sup>          | Mixed                            |                                                                                                                                                                                          |
| Archery                   | 3        | Outdoor                       | Skill                            |                                                                                                                                                                                          |
| Football 5-a-side         | 3        | Outdoor                       | Mixed                            |                                                                                                                                                                                          |
| Judo                      | 3        | Indoor                        | Power                            |                                                                                                                                                                                          |
| Canoe                     | 2        | Outdoor                       | Power                            |                                                                                                                                                                                          |
| Triathlon                 | 2        | Outdoor                       | Endurance                        |                                                                                                                                                                                          |
| Wheelchair rugby          | 2        | Indoor                        | Mixed                            |                                                                                                                                                                                          |
| Athletics, Triathlon      | 1        | Outdoor                       | Endurance                        | Athletics: marathon (n=1).                                                                                                                                                               |
| Cycling, Triathlon        | 1        | Outdoor                       | Endurance                        | Cycling: road race (n=1),<br>time trial (n=1).                                                                                                                                           |
| Powerlifting              | 1        | Indoor                        | Power                            |                                                                                                                                                                                          |
| Shooting                  | 1        | Outdoor                       | Skill                            |                                                                                                                                                                                          |
| Table tennis              | 1        | Indoor                        | Skill                            |                                                                                                                                                                                          |
| Taekwondo                 | 1        | Indoor                        | Power                            |                                                                                                                                                                                          |
| Wheelchair fencing        | 1        | Indoor                        | Mixed                            |                                                                                                                                                                                          |

<sup>a</sup>Sports performed by respondents (n), with two respondents competing in two sports. <sup>\*</sup>Tennis was played both indoor and outdoor; when WBGT limits were exceeded, matches on Center Court were played with retracted roof.

**Table 3** Sex, continent and impairment of indoor and outdoor athletes.

|            |                          | Indoor   | Outdoor  |
|------------|--------------------------|----------|----------|
| Sex        | Male                     | 15 (29%) | 36 (71%) |
|            | Female                   | 28 (50%) | 28 (50%) |
| Continent  | Africa                   | 1 (50%)  | 1 (50%)  |
|            | Asia                     | 12 (29%) | 30 (71%) |
|            | Europe                   | 14 (36%) | 25 (64%) |
|            | North-America            | 6 (86%)  | 1 (14%)  |
|            | Oceania                  | 3 (30%)  | 7 (70%)  |
|            | South-America            | 7 (100%) | 0 (0%)   |
| Impairment | SCI                      | 6 (32%)  | 13 (68%) |
|            | Limb deficiency          | 11 (41%) | 16 (59%) |
|            | Visual/Intellectual/None | 7 (30%)  | 16 (70%) |
|            | Other                    | 19 (51%) | 18 (49%) |

**Table 4** Cooling strategy questions strategies included 18 options (incl. “Other” to be specified), but strategies were later categorized into 7 main categories. A cooling category was selected when the participant used one or multiple strategies in that category.

| Category             | Strategies                                                                                                                                   |
|----------------------|----------------------------------------------------------------------------------------------------------------------------------------------|
| Beverage             | Ice-slurry ingestion<br>Cold beverage ingestion                                                                                              |
| Cold towels/bags     | Cold towel(s)<br>Neck collar<br>Ice bag(s)                                                                                                   |
| Cold water immersion | Whole-body cold water immersion<br>Cold water immersion of the hands<br>Cold water immersion of the legs<br>Cold water immersion of the feet |
| Cooling vest         | Cold towel(s)<br>Neck collar<br>Ice bag(s)                                                                                                   |
| Fanning              | Fanning                                                                                                                                      |
| Menthol              | Menthol mouth rinse<br>Ethanol/menthol on the skin of the face and/or neck<br>Ethanol/menthol on the skin of the torso, arms and/or legs     |
| Water spray          | Water spray on the face and/or neck<br>Water spray on the torso, arms and/or legs                                                            |
