# Supplementary material
Source: publisher figshare collection journal article supplement (https://tandf.figshare.com/articles/dataset/_/21571840)
Supplement: Supplementary file 2 [file 1]

# Supplemental file 3

## *Hydration plans and strategy development in Tokyo*

---

### **Article title**

Heat preparedness and exertional heat illness in Paralympic athletes: A Tokyo 2020 survey

### **Authors**

Puck Alkemade<sup>1</sup>, Hein A. M. Daanen<sup>1</sup>, Thomas W. J. Janssen<sup>1</sup>, Elizabeth Broad<sup>2</sup>, Victoria L. Goosey-Tolfrey<sup>3</sup>, Tatsuru Ibusuki<sup>4</sup>, Hiske Kneepkens<sup>5</sup>, Julien D. Périard<sup>6</sup>, Thijs M. H. Eijsvogels<sup>7</sup>

### **Corresponding author**

Puck Alkemade, [puckalkemade@gmail.com](mailto:puckalkemade@gmail.com)

### **Author affiliations**

<sup>1</sup>Faculty of Behavioural and Movement Sciences, Vrije Universiteit Amsterdam, Amsterdam Movement Sciences, Amsterdam, The Netherlands.

<sup>2</sup>Freelance Sports Dietitian, Huskisson, Australia.

<sup>3</sup>Peter Harrison Centre for Disability Sport, School of Sport, Exercise and Health Sciences, Loughborough University, Loughborough, Leicestershire LE11 3TU, UK.

<sup>4</sup>Department of Rehabilitation Medicine, Akeno Central Hospital, Oita, Japan.

<sup>5</sup>Sport Medisch Centrum Papendal, NOC\*NSF, Arnhem, The Netherlands.

<sup>6</sup>University of Canberra Research Institute for Sport and Exercise, Bruce, Australia.

<sup>7</sup>Radboud Institute for Health Sciences, Department of Physiology, Radboud University Medical Center, Nijmegen, The Netherlands.

### A. Hydration plan use

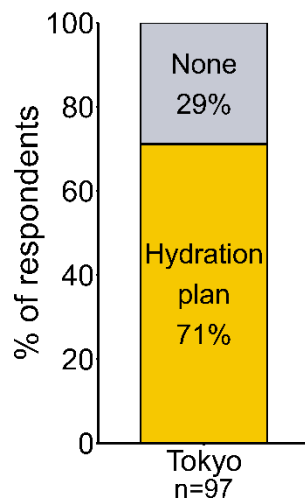

### B. Fluids in hydration plan

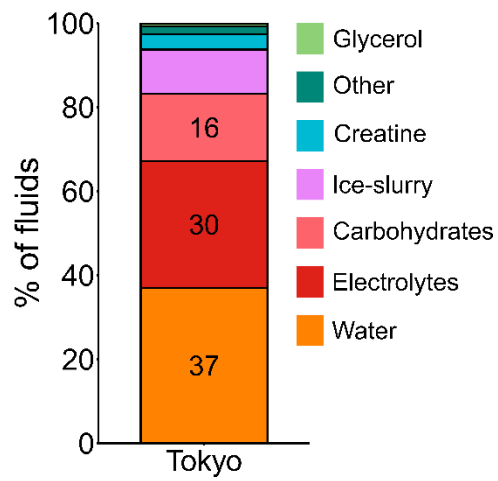

**Fig. 1 A;** Percentage of respondents with an hydration plan in Tokyo, either pre- or during competition. **B;** Prevalence of fluids used in hydration plans in Tokyo. Percentages >10% are displayed in the appropriate bars.

### A. Support strategies Tokyo

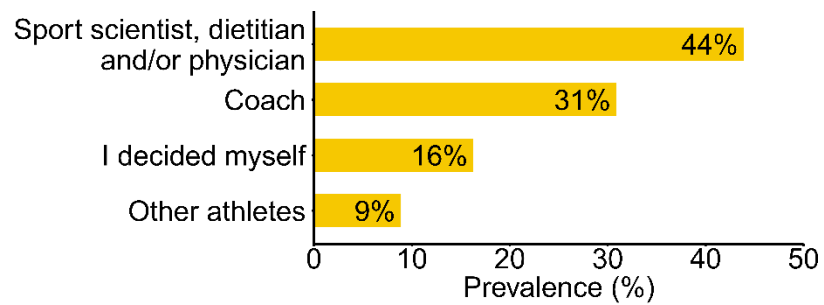

### B. Influential factors strategies Tokyo

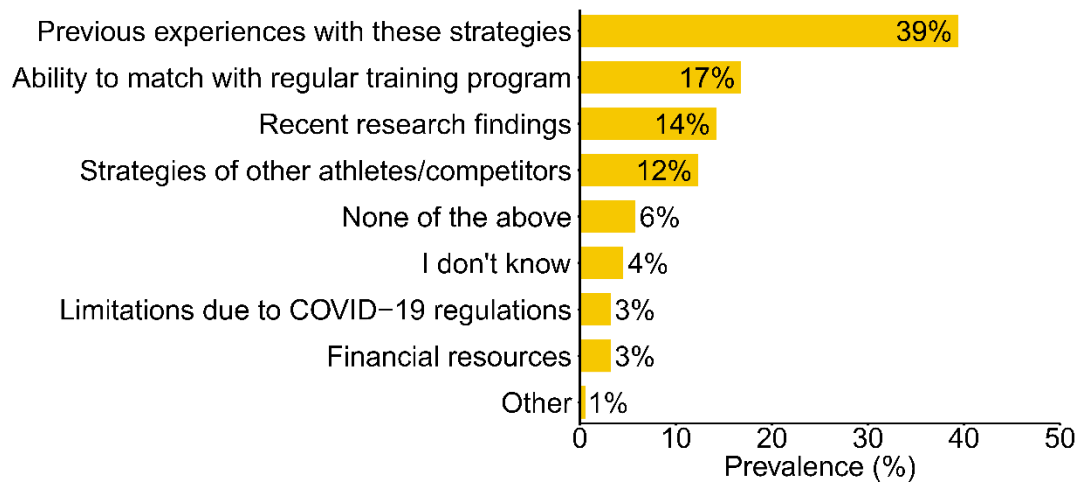

**Fig. 2 A;** Support received by athletes in developing heat mitigation strategies for the Tokyo 2020 Paralympic Games. **B;** Factors that influenced strategy development for Tokyo. Prevalence is expressed in percentage of total answers selected.
