# Supplementary material
Source: publisher figshare collection journal article supplement (https://tandf.figshare.com/articles/dataset/_/21571840)
Supplement: Supplementary file 3 [file 1]

# Supplemental file 1

## *Pre- and post-Paralympic surveys*

---

### **Article title**

Heat preparedness and exertional heat illness in Paralympic athletes: A Tokyo 2020 survey

### **Authors**

Puck Alkemade<sup>1</sup>, Hein A. M. Daanen<sup>1</sup>, Thomas W. J. Janssen<sup>1</sup>, Elizabeth Broad<sup>2</sup>, Victoria L. Goosey-Tolfrey<sup>3</sup>, Tatsuru Ibusuki<sup>4</sup>, Hiske Kneepkens<sup>5</sup>, Julien D. Périard<sup>6</sup>, Thijs M. H. Eijssvogels<sup>7</sup>

### **Corresponding author**

Puck Alkemade, [puckalkemade@gmail.com](mailto:puckalkemade@gmail.com)

### **Author affiliations**

<sup>1</sup>Faculty of Behavioural and Movement Sciences, Vrije Universiteit Amsterdam, Amsterdam Movement Sciences, Amsterdam, The Netherlands.

<sup>2</sup>Freelance Sports Dietitian, Huskisson, Australia.

<sup>3</sup>Peter Harrison Centre for Disability Sport, School of Sport, Exercise and Health Sciences, Loughborough University, Loughborough, Leicestershire LE11 3TU, UK.

<sup>4</sup>Department of Rehabilitation Medicine, Akeno Central Hospital, Oita, Japan.

<sup>5</sup>Sport Medisch Centrum Papendal, NOC\*NSF, Arnhem, The Netherlands.

<sup>6</sup>University of Canberra Research Institute for Sport and Exercise, Bruce, Australia.

<sup>7</sup>Radboud Institute for Health Sciences, Department of Physiology, Radboud University Medical Center, Nijmegen, The Netherlands.

# Pre-Paralympic survey

## Personal details

---

First name: \_\_\_\_\_

Last name: \_\_\_\_\_

Date of birth:

| Month           | Day             | Year            |
|-----------------|-----------------|-----------------|
| <i>dropdown</i> | <i>dropdown</i> | <i>dropdown</i> |

Nationality: \_\_\_\_\_

Height (please select the appropriate unit and fill in your height):

*Without prostheses/braces*

- ☐ Centimeters \_\_\_\_\_
- ☐ Feet-inches \_\_\_\_\_
- ☐ I don't know

Weight (please select the appropriate unit and fill in your weight):

*Without prostheses*

- ☐ Kilogram \_\_\_\_\_
- ☐ Pounds \_\_\_\_\_
- ☐ Stone-pounds \_\_\_\_\_
- ☐ I don't know

Gender:

- ☐ Male
- ☐ Female
- ☐ Prefer not to say

## Impairment

---

Please specify the health condition that causes your impairment:

### *Impaired muscle power*

- ☐ Spinal cord injury
- ☐ Muscular dystrophy
- ☐ Brachial plexus injury
- ☐ Erb's palsy
- ☐ Polio
- ☐ Spina bifida
- ☐ Guillain-Barré syndrome

### *Impaired passive range of motion (PROM)*

- ☐ Arthrogryposis
- ☐ Ankylosis
- ☐ Post burns joint contractures

### *Limb deficiency*

- ☐ Amputation resulting from trauma
- ☐ Congenital limb deficiency (present at birth)

### *Leg length difference*

- ☐ Congenital leg length difference (present at birth)
- ☐ Leg length difference resulting from trauma

### *Short stature*

- ☐ Achondroplasia
- ☐ Growth dysfunction

### *Hypertonia / Ataxia / Athetosis*

- ☐ Cerebral palsy
- ☐ Stroke
- ☐ Brain injury
- ☐ Multiple sclerosis
- ☐ Friedreich's ataxia
- ☐ Spinocerebellar ataxia

### *Vision impairment*

- ☐ Myopia
- ☐ Tunnel vision
- ☐ Scotoma
- ☐ Retinitis pigmentosa
- ☐ Glaucoma
- ☐ Congenital cataract
- ☐ Macular degeneration

### *Intellectual impairment*

- ☐ Fragile X Syndrome
- ☐ Down Syndrome
- ☐ Autism Spectrum Disorders

- ☐ Intellectual impairment resulting from trauma
- ☐ Learning deficiency
- ☐ Intellectual retardation

Other (if you did not find your impairment above)

- ☐ Other, please specify: \_\_\_\_\_

*Display This Question:*

*If Please specify the health condition that causes your impairment: = Spinal cord injury*

Please specify the range that applies to the level of the spinal cord lesion (tick all that apply):

- ☐ Cervical (C1-C8)
- ☐ High thoracic (T1-T6)
- ☐ Low thoracic (T7-T12)
- ☐ Lumbar (L1-L5)
- ☐ Sacral (S1-S5)

Please specify the completeness of the spinal cord lesion:

- ☐ Complete loss of both sensory and motor function below lesion level (ASIA A)
- ☐ Sensory function preserved, but complete loss of motor function below lesion level (ASIA B)
- ☐ Motor function preserved, but complete loss of sensory function below lesion level (ASIA C/D)

How would you rate your ability to sweat below the lesion level, on a scale from 1 to 5?

No sweating  
response below  
lesion level  
1

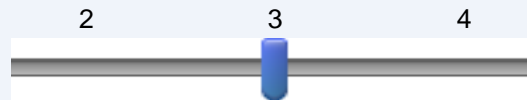

Full sweating  
response below  
lesion level  
5

*Display This Question:*

*If Please specify the health condition that causes your impairment: = Amputation resulting from trauma  
Or = Congenital limb deficiency (present at birth)*

Please tick the boxes that apply to the limb deficiency:

- ☐ Single upper limb deficiency
- ☐ Bilateral upper limb deficiency
- ☐ Single lower limb deficiency
- ☐ Bilateral lower limb deficiency

Time since impairment:

- ☐ 3 years or less
- ☐ 3-5 years
- ☐ 6-10 years
- ☐ More than 10 years
- ☐ Congenital (present at birth)

## Sports participation

---

For how many years have you participated in Paralympic sports at the international level?

- ☐ 5 years or less
- ☐ 6-10 years
- ☐ 11-20 years
- ☐ 21-30 years
- ☐ More than 30 years

Over the last year, what were your average training hours per week? Please slide the pin on the bar to the appropriate number.

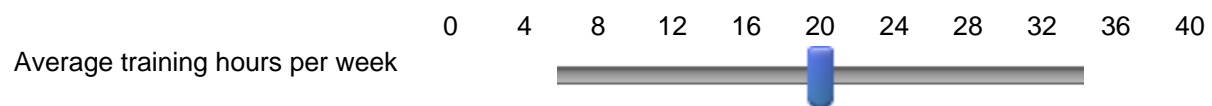

- ☐ I don't know

What competition(s) are you participating in at the Tokyo Paralympics? Tick all that apply.

- ☐ Archery
- ☐ Athletics
- ☐ Badminton
- ☐ Boccia
- ☐ Canoe
- ☐ Cycling
- ☐ Equestrian
- ☐ Football 5-a-side
- ☐ Goalball
- ☐ Judo
- ☐ Powerlifting
- ☐ Rowing
- ☐ Shooting
- ☐ Sitting volleyball
- ☐ Swimming
- ☐ Table tennis
- ☐ Taekwondo
- ☐ Triathlon
- ☐ Wheelchair basketball
- ☐ Wheelchair fencing
- ☐ Wheelchair rugby
- ☐ Wheelchair tennis

*Display This Question:*

*If What competition(s) are you participating in at the Tokyo Paralympics? Tick all that apply. = Athletics*

#### *Athletics*

Please specify the event(s) that you are participating in during the Tokyo Paralympics. Tick all that apply.

- ☐ Track - 100m
- ☐ Track - 200m
- ☐ Track - 400m
- ☐ Track - 800m
- ☐ Track - 1500m
- ☐ Track - 5000m
- ☐ Track - universal relay (4x100m)
- ☐ Road - marathon
- ☐ Field - high jump
- ☐ Field - long jump
- ☐ Field - discus
- ☐ Field - shot put
- ☐ Field - javelin
- ☐ Field - club throw

*Display This Question:*

*If What competition(s) are you participating in at the Tokyo Paralympics? Tick all that apply. = Cycling*

*Cycling*

Please specify the event(s) you are participating in during the Tokyo Paralympics. Tick all that apply.

- ☐ Road - Road Race
- ☐ Road - Time Trial
- ☐ Road - Team Relay
- ☐ Track - 500m Time Trial
- ☐ Track - 1000m Time Trial
- ☐ Track - Individual Pursuit
- ☐ Track - 750m Team Sprint

*Cycling*

Please specify your classification:

- ☐ C1
- ☐ C2
- ☐ C3
- ☐ C4
- ☐ C5
- ☐ H1
- ☐ H2
- ☐ H3
- ☐ H4
- ☐ H5
- ☐ T1
- ☐ T2
- ☐ B1
- ☐ B2
- ☐ B3

*Display This Question:*

*If What competition(s) are you participating in at the Tokyo Paralympics? Tick all that apply. = Swimming*

### *Swimming*

Please specify the events that you are participating in during the Tokyo Paralympics. Tick all that apply.

- ☐ 50m Freestyle
- ☐ 100m Freestyle
- ☐ 200m Freestyle
- ☐ 400m Freestyle
- ☐ 50m Backstroke
- ☐ 100m Backstroke
- ☐ 50m Breaststroke
- ☐ 100m Breaststroke
- ☐ 50m Butterfly
- ☐ 100m Butterfly
- ☐ 150m Individual Medley
- ☐ 200m Individual Medley
- ☐ 4x100m Freestyle Relay
- ☐ 4x100m Medley Relay
- ☐ 4x50m Freestyle Relay

*Display This Question:*

*If What competition(s) are you participating in at the Tokyo Paralympics? Tick all that apply. = Wheelchair basketball*

### *Wheelchair basketball*

Please specify your point value:

- ☐ 1.0
- ☐ 2.0
- ☐ 3.0
- ☐ 4.0
- ☐ 4.5

*Display This Question:*

*If What competition(s) are you participating in at the Tokyo Paralympics? Tick all that apply. = Wheelchair rugby*

### *Wheelchair rugby*

Please specify your point value:

*For females, please select your actual classification value (i.e. do not subtract 0.5).*

- ☐ 0.5
- ☐ 1.0
- ☐ 1.5
- ☐ 2.0
- ☐ 2.5
- ☐ 3.0
- ☐ 3.5



## Heat

---

Have you ever experienced the following heat-stress related symptoms during or immediately (<30 min) after a training or competition? Please answer for each environmental condition.

|                        | <b>Cool</b><br>(<15 °C / <59 °F) |                       |                       | <b>Neutral</b><br>(15-25 °C / 59-77 °F) |                       |                       | <b>Hot</b><br>(>25 °C / >77 °F) |                       |                       |
|------------------------|----------------------------------|-----------------------|-----------------------|-----------------------------------------|-----------------------|-----------------------|---------------------------------|-----------------------|-----------------------|
|                        | Yes                              | No                    | Not applicable        | Yes                                     | No                    | Not applicable        | Yes                             | No                    | Not applicable        |
| Cramping               | <input type="radio"/>            | <input type="radio"/> | <input type="radio"/> | <input type="radio"/>                   | <input type="radio"/> | <input type="radio"/> | <input type="radio"/>           | <input type="radio"/> | <input type="radio"/> |
| Nausea                 | <input type="radio"/>            | <input type="radio"/> | <input type="radio"/> | <input type="radio"/>                   | <input type="radio"/> | <input type="radio"/> | <input type="radio"/>           | <input type="radio"/> | <input type="radio"/> |
| Vomiting               | <input type="radio"/>            | <input type="radio"/> | <input type="radio"/> | <input type="radio"/>                   | <input type="radio"/> | <input type="radio"/> | <input type="radio"/>           | <input type="radio"/> | <input type="radio"/> |
| Dizziness              | <input type="radio"/>            | <input type="radio"/> | <input type="radio"/> | <input type="radio"/>                   | <input type="radio"/> | <input type="radio"/> | <input type="radio"/>           | <input type="radio"/> | <input type="radio"/> |
| Severe headache        | <input type="radio"/>            | <input type="radio"/> | <input type="radio"/> | <input type="radio"/>                   | <input type="radio"/> | <input type="radio"/> | <input type="radio"/>           | <input type="radio"/> | <input type="radio"/> |
| Collapsing / fainting  | <input type="radio"/>            | <input type="radio"/> | <input type="radio"/> | <input type="radio"/>                   | <input type="radio"/> | <input type="radio"/> | <input type="radio"/>           | <input type="radio"/> | <input type="radio"/> |
| Other (please specify) | <input type="radio"/>            | <input type="radio"/> | <input type="radio"/> | <input type="radio"/>                   | <input type="radio"/> | <input type="radio"/> | <input type="radio"/>           | <input type="radio"/> | <input type="radio"/> |

Have you ever been diagnosed with exertional heat illness?

*"Diagnosed" means that this was determined by first-aid personnel, your team physician, general practitioner or in a hospital. Examples: dehydration, hyponatremia, heat syncope, heat exhaustion, heat stroke.*

- ☐ Yes
- ☐ No

Display This Question:

If Have you ever been diagnosed with exertional heat illness? = Yes

What diagnoses did you receive, and how many times did you receive a diagnosis?

The diagnoses should have been made by first-aid personnel, your team physician, general practitioner or in a hospital.

|                                                                                                         | What diagnoses did you receive? | How many times did you receive this diagnosis? |
|---------------------------------------------------------------------------------------------------------|---------------------------------|------------------------------------------------|
|                                                                                                         | Tick all that apply             |                                                |
| Dehydration<br>Severe fluid deficit in the body                                                         | <input type="checkbox"/>        | Dropdown<br>1 – More than 5                    |
| Hyponatremia<br>Low sodium concentration in the blood                                                   | <input type="checkbox"/>        | Dropdown<br>1 – More than 5                    |
| Heat syncope<br>Fainting as a result of overheating                                                     | <input type="checkbox"/>        | Dropdown<br>1 – More than 5                    |
| Heat exhaustion<br>Inability to effectively exercise due to elevated body core temperature.             | <input type="checkbox"/>        | Dropdown<br>1 – More than 5                    |
| Heat stroke<br>Most severe heat illness. Collapse/confusion/seizures due to high body core temperature. | <input type="checkbox"/>        | Dropdown<br>1 – More than 5                    |
| I don't know                                                                                            | <input type="checkbox"/>        | Dropdown<br>1 – More than 5                    |

Display This Question:

If Have you ever been diagnosed with exertional heat illness? = Yes

How long ago did you receive the last diagnosis?

The diagnosis should have been made by first-aid personnel, your team physician, general practitioner or in a hospital.

- ☐ In the past year
- ☐ 1-3 years ago
- ☐ 3-5 years ago
- ☐ 5-10 years ago
- ☐ 10-20 years ago
- ☐ More than 20 years ago

How would you rate your own capacity to handle exercise in warm/hot conditions (>25°C / 77°F)?

- ☐ Very good
- ☐ Good
- ☐ Average
- ☐ Bad
- ☐ Very bad

### Preparatory strategies: Heat acclimation

---

In the last year, how much time in total have you spent on a location with a hot climate (>25°C / 77°F)?

*If you have been on multiple trips to locations with a hot climate, please add up the total time of these trips.*

- ☐ None
- ☐ 0-2 months
- ☐ 2-4 months
- ☐ 4-6 months
- ☐ 6-8 months
- ☐ 8-12 months

“Heat acclimation” is an effective strategy to prepare for competition in warm/hot environments. To “acclimate” (i.e. adapt) to the heat, athletes have to expose themselves to a warm/hot environment on multiple occasions. This can, for example, be done in a naturally hot environment, climatic chamber, or using a hot bath or sauna.

Have you ever used a heat acclimation strategy in preparation for competition before (excluding preparation Tokyo Paralympics)?

- ☐ Yes
- ☐ No

*Display This Question:*

*If Have you ever used a heat acclimation strategy in preparation for competition before? = Yes*

What heat acclimation strategies have you ever used before (excluding preparation for Tokyo Paralympics)? Tick all that apply.

- ☐ Training in a natural hot environment (e.g. training camp)
- ☐ Training in an artificial hot room / laboratory / climate chamber
- ☐ Sauna bathing
- ☐ Hot water bathing
- ☐ Other (please specify) \_\_\_\_\_

*Display This Question:*

*If Have you ever used a heat acclimation strategy in preparation for competition before? = No*

Why have you never used a heat acclimations strategy before (excluding preparation for Tokyo Paralympics)? Tick all that apply.

- ☐ I have never competed in warm/hot conditions before
- ☐ I didn't have the financial resources
- ☐ I and/or my support team did not have sufficient knowledge about this topic
- ☐ It did not fit in my training schedule
- ☐ I thought it was not effective
- ☐ Other (please specify) \_\_\_\_\_

Did/will you use a heat acclimation strategy in preparation for the Tokyo Paralympics?

- ☐ Yes
- ☐ No

*Display This Question:*

*If Did/will you use a heat acclimation strategy in preparation for the Tokyo Paralympics? = Yes*

What heat acclimation strategy did/will you use in preparation for the Tokyo Paralympics? Tick all that apply.

- ☐ Training in a natural hot environment (e.g. training camp)
- ☐ Training in an artificial hot room / laboratory / climate chamber
- ☐ Sauna bathing
- ☐ Hot water bathing
- ☐ Other (please specify) \_\_\_\_\_

Please specify the following characteristics of your heat acclimation strategy for the Tokyo Paralympics:

|                                                                    | 0 | 5 | 10 | 15                                                                                    | 20 | 25 | 30 |
|--------------------------------------------------------------------|---|---|----|---------------------------------------------------------------------------------------|----|----|----|
| How many heat acclimation sessions did/will you complete in total? |   |   |    |  |    |    |    |
| Over how many days were/are these sessions distributed?            |   |   |    |  |    |    |    |

*Display This Question:*

*If Did/will you use a heat acclimation strategy in preparation for the Tokyo Paralympics? = No*

Why did/will you not use a heat acclimation strategy in preparation for the Tokyo Paralympics? Tick all that apply.

- ☐ I don't have the financial resources
- ☐ I and/or my support team do(es) not have sufficient knowledge about this topic
- ☐ It does not fit in my training schedule
- ☐ I think it is not effective
- ☐ I think it is not needed for this event
- ☐ Other (please specify) \_\_\_\_\_

When will you arrive in Tokyo or surroundings for the Paralympics?

*If you currently live in Tokyo, please select "Not applicable" in both categories*

|                 |                 |
|-----------------|-----------------|
| Month           | Day             |
| <i>dropdown</i> | <i>dropdown</i> |

When will you have your first match/race of the Tokyo Paralympics?

|                 |                 |
|-----------------|-----------------|
| Month           | Day             |
| <i>dropdown</i> | <i>dropdown</i> |

## Preparatory strategies: Cooling

---

Have you ever used cooling method(s) before or during competition (excluding preparation for Tokyo Paralympics)?

- ☐ Yes
- ☐ No

Display This Question:

If Have you ever used cooling method(s) before or during competition? = Yes

Please tick all cooling methods that you have ever used before and during (a) race(s)/match(es):

- Cooling before exercise is called *pre-cooling*, meaning cooling prior to the exercise.
- Cooling during exercise is called *per-cooling*, meaning cooling during the exercise.  
This includes cooling during breaks (for example, when subbing or during halftime).

|                                                            | <b>Before (a)<br/>race(s)/match(es)<br/>i.e. pre-cooling</b> | <b>During (a)<br/>race(s)/match(es)<br/>i.e. per-cooling</b> |
|------------------------------------------------------------|--------------------------------------------------------------|--------------------------------------------------------------|
|                                                            | Tick all that apply                                          | Tick all that apply                                          |
| Cold towel(s)                                              | <input type="radio"/>                                        | <input type="radio"/>                                        |
| Neck collar                                                | <input type="radio"/>                                        | <input type="radio"/>                                        |
| Ice bag(s)                                                 | <input type="radio"/>                                        | <input type="radio"/>                                        |
| Water spray on the face and/or neck                        | <input type="radio"/>                                        | <input type="radio"/>                                        |
| Water spray on the torso, arms and/or legs                 | <input type="radio"/>                                        | <input type="radio"/>                                        |
| Fanning                                                    | <input type="radio"/>                                        | <input type="radio"/>                                        |
| Evaporation vest (submerged in water)                      | <input type="radio"/>                                        | <input type="radio"/>                                        |
| Ice vest / PCM vest                                        | <input type="radio"/>                                        | <input type="radio"/>                                        |
| Whole-body cold water immersion                            | <input type="radio"/>                                        | <input type="radio"/>                                        |
| Cold water immersion of the hands                          | <input type="radio"/>                                        | <input type="radio"/>                                        |
| Cold water immersion of the legs                           | <input type="radio"/>                                        | <input type="radio"/>                                        |
| Cold water immersion of the feet                           | <input type="radio"/>                                        | <input type="radio"/>                                        |
| Cold beverage ingestion                                    | <input type="radio"/>                                        | <input type="radio"/>                                        |
| Ice-slurry ingestion                                       | <input type="radio"/>                                        | <input type="radio"/>                                        |
| Menthol mouth rinse                                        | <input type="radio"/>                                        | <input type="radio"/>                                        |
| Ethanol/menthol on the skin of the face and/or neck        | <input type="radio"/>                                        | <input type="radio"/>                                        |
| Ethanol/menthol on the skin of the torso, arms and/or legs | <input type="radio"/>                                        | <input type="radio"/>                                        |
| Other (please specify) _____                               | <input type="radio"/>                                        | <input type="radio"/>                                        |

*Display This Question:*

*If Have you ever used cooling method(s) before or during competition? = No*

Why have you never used cooling method(s) before or during competition (excluding preparation for Tokyo Paralympics)? Tick all that apply.

- ☐ I have never competed in warm/hot conditions
- ☐ I didn't have the financial resources
- ☐ I and/or my support team did not have sufficient knowledge about this topic
- ☐ I thought it was not effective
- ☐ I didn't like the cooling
- ☐ Other (please specify) \_\_\_\_\_

Will you use cooling method(s) during the Tokyo Paralympics?

- ☐ Yes
- ☐ No

*Display This Question:*

*If Will you use cooling method(s) during the Tokyo Paralympics? = Yes*

What cooling method(s) do you plan on using before and during the race(s)/match(es) at the Tokyo Paralympics? Tick all that apply.

- Cooling before exercise is called *pre-cooling*, meaning cooling prior to the exercise.
- Cooling during exercise is called *per-cooling*, meaning cooling during the exercise.  
This includes cooling during breaks (for example, when subbing or during halftime).

|                                            | <b>Before (a)<br/>race(s)/match(es)<br/>i.e. pre-cooling</b> | <b>During (a)<br/>race(s)/match(es)<br/>i.e. per-cooling</b> |
|--------------------------------------------|--------------------------------------------------------------|--------------------------------------------------------------|
|                                            | Tick all that apply                                          | Tick all that apply                                          |
| Cold towel(s)                              | <input type="radio"/>                                        | <input type="radio"/>                                        |
| Neck collar                                | <input type="radio"/>                                        | <input type="radio"/>                                        |
| Ice bag(s)                                 | <input type="radio"/>                                        | <input type="radio"/>                                        |
| Water spray on the face and/or neck        | <input type="radio"/>                                        | <input type="radio"/>                                        |
| Water spray on the torso, arms and/or legs | <input type="radio"/>                                        | <input type="radio"/>                                        |
| Fanning                                    | <input type="radio"/>                                        | <input type="radio"/>                                        |
| Evaporation vest (submerged in water)      | <input type="radio"/>                                        | <input type="radio"/>                                        |
| Ice vest / PCM vest                        | <input type="radio"/>                                        | <input type="radio"/>                                        |

|                                                            |                       |                       |
|------------------------------------------------------------|-----------------------|-----------------------|
| Whole-body cold water immersion                            | <input type="radio"/> | <input type="radio"/> |
| Cold water immersion of the hands                          | <input type="radio"/> | <input type="radio"/> |
| Cold water immersion of the legs                           | <input type="radio"/> | <input type="radio"/> |
| Cold water immersion of the feet                           | <input type="radio"/> | <input type="radio"/> |
| Cold beverage ingestion                                    | <input type="radio"/> | <input type="radio"/> |
| Ice-slurry ingestion                                       | <input type="radio"/> | <input type="radio"/> |
| Menthol mouth rinse                                        | <input type="radio"/> | <input type="radio"/> |
| Ethanol/menthol on the skin of the face and/or neck        | <input type="radio"/> | <input type="radio"/> |
| Ethanol/menthol on the skin of the torso, arms and/or legs | <input type="radio"/> | <input type="radio"/> |
| Other (please specify) _____                               | <input type="radio"/> | <input type="radio"/> |

*Display This Question:*

*If Will you use cooling method(s) during the Tokyo Paralympics? = No*

Why will you not use cooling method(s) during the Tokyo Paralympics? Tick all that apply.

- ☐ I don't have the financial resources
- ☐ I and/or my support team do(es) not have sufficient knowledge about this topic
- ☐ I think it is not effective
- ☐ I don't like the cooling
- ☐ I think it is not needed for this event
- ☐ Other (please specify) \_\_\_\_\_

## Preparatory strategies: Hydration

Do you have a hydration plan for the hours leading up to your race(s) or match(es) in the Tokyo Paralympics?  
i.e. *do you plan in advance how much and/or what you will drink?*

- ☐ Yes
- ☐ No



*Display This Question:*

*If Do you have a hydration plan for the hours leading up to your race(s) or match(es) in the Tokyo Paralympics? = Yes*

Please specify what the fluid(s) in your hydration plan include(s). Tick all boxes that apply.

*This question concerns the hydration plan for the hours leading up to your race(s) or match(es) in the Tokyo Paralympics.*

- ☐ Water
- ☐ Electrolytes (examples: salt, magnesium, sodium, potassium, chloride and calcium)
- ☐ Carbohydrates/sugars
- ☐ Glycerol
- ☐ Creatine
- ☐ Ice-slurry
- ☐ Other (please specify) \_\_\_\_\_

Do you have a hydration plan for during your race(s) or match(es) in the Tokyo Paralympics?

- ☐ Yes
- ☐ No
- ☐ Not applicable

*Display This Question:*

*If Do you have a hydration plan for during your race(s) or match(es) in the Tokyo Paralympics? = Yes*

Please specify what the fluid(s) in your hydration plan include(s). Tick all boxes that apply.

*This question concerns the hydration plan during your race(s) or match(es) in the Tokyo Paralympics.*

- ☐ Water
- ☐ Electrolytes (examples: salt, magnesium, sodium, potassium, chloride and calcium)
- ☐ Carbohydrates/sugars
- ☐ Glycerol
- ☐ Creatine
- ☐ Ice-slurry
- ☐ Other (please specify) \_\_\_\_\_

## Preparatory strategies: Support

---

*Display This Question:*

*If Did/will you use a heat acclimation strategy in preparation for the Tokyo Paralympics? = Yes*

*Or Will you use cooling method(s) during the Tokyo Paralympics? = Yes*

*Or Do you have a hydration plan for the hours leading up to... Tokyo Paralympics = Yes*

*Or Do you have a hydration plan for during your race(s) or match(es) in the Tokyo Paralympics? = Yes*

You indicated that you will use a heat acclimation strategy, cooling and/or hydration plan for the Tokyo Paralympics. What support did you receive in developing these strategies? Tick all that apply.

- ☐ Support of a sport scientist, dietitian and/or physician
- ☐ Support of my coach
- ☐ Support of other athletes
- ☐ No external support (I decided myself)
- ☐ Other (please specify) \_\_\_\_\_

What factors had an influence on the development of your heat acclimation / cooling / hydration strategies? Tick all that apply.

- ☐ Previous experiences with these strategies
- ☐ Recent research findings
- ☐ Strategies of other athletes/competitors
- ☐ Ability to match with regular training program
- ☐ Financial resources
- ☐ Limitations due to COVID-19 regulations
- ☐ I don't know, the strategies were developed for me
- ☐ Other (please specify) \_\_\_\_\_
- ☐ None of the above

## Post-Paralympic survey

On average, how comfortable were you with the climate during your races/matches at the 2020 Paralympics? Please provide a rating on a scale from 1 to 10 (0 = Extremely uncomfortable / 10 = Extremely comfortable).

0 = Extremely  
uncomfortable

5 = Neutral

10 = Extremely  
comfortable

0 1 2 3 4 5 6 7 8 9 10

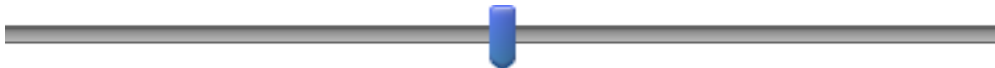

Did you experience any of the following heat-related illness symptoms **during or immediately (<30 min) after** any of your races/matches at the Tokyo Paralympics? Tick all that apply. Please also select in how many races/matches you had these symptoms.

|                        | Did you experience any of these symptoms? | In how many races/matches did you have these symptoms? |
|------------------------|-------------------------------------------|--------------------------------------------------------|
|                        | Tick all that apply                       |                                                        |
| Cramping               | <input type="checkbox"/>                  | <i>Dropdown<br/>1 – More than 5</i>                    |
| Nausea                 | <input type="checkbox"/>                  | <i>Dropdown<br/>1 – More than 5</i>                    |
| Vomiting               | <input type="checkbox"/>                  | <i>Dropdown<br/>1 – More than 5</i>                    |
| Dizziness              | <input type="checkbox"/>                  | <i>Dropdown<br/>1 – More than 5</i>                    |
| Severe headache        | <input type="checkbox"/>                  | <i>Dropdown<br/>1 – More than 5</i>                    |
| Collapsing / fainting  | <input type="checkbox"/>                  | <i>Dropdown<br/>1 – More than 5</i>                    |
| Other (please specify) | <input type="checkbox"/>                  | <i>Dropdown<br/>1 – More than 5</i>                    |

Were you diagnosed with exertional heat illness during the Tokyo 2020 Paralympics?

*"Diagnosed" means that this was determined by first-aid personnel, your team physician, general practitioner or in a hospital.*

*Examples: dehydration, hyponatremia, heat syncope, heat exhaustion, heat stroke.*

- ☐ Yes
- ☐ No

*Display This Question:*

*If Were you diagnosed with exertional heat illness during the Tokyo 2020 Paralympics? = Yes*

What diagnoses did you receive?

*The diagnoses should have been made by first-aid personnel, your team physician, general practitioner or in a hospital.*

- ☐ Dehydration  
*Severe fluid deficit in the body*
- ☐ Hyponatremia  
*Low sodium concentration in the blood*
- ☐ Heat syncope  
*Fainting as a result of overheating*
- ☐ Heat exhaustion  
*Inability to effectively exercise due to elevated body core temperature.*
- ☐ Heat stroke  
*Most severe heat illness. Collapse/confusion/ seizures due to high body core temperature.*
- ☐ I don't know

**“Heat acclimation” is an effective strategy to prepare for competition in warm/hot environments. To “acclimate” (i.e. adapt) to the heat, athletes have to expose themselves to a warm/hot environment on multiple occasions. This can, for example, be done in a naturally hot environment, climatic chamber, or using a hot bath or sauna.**

Did you use heat acclimation in preparation for the 2020 Tokyo Paralympics?

- ☐ Yes
- ☐ No

*Display This Question:*

*If Did you use heat acclimation in preparation for the 2020 Tokyo Paralympics? = Yes*

Did your heat acclimation strategy go according to your plans made before the 2020 Tokyo Paralympics?

- ☐ Yes, it went according to plan
- ☐ No, it did not go according to plan

*Display This Question:*

*If Did your heat acclimation strategy go according to your plans made before the 2020 Tokyo Paralympics?  
= No, it did not go according to plan.*

Why did your heat acclimation strategy not go according to plan?

*For example:*

*Did you not complete the planned amount of heat acclimation days?*

*Was the ambient temperature during heat acclimation not as expected?*

Did you use cooling strategies before or during (a) race(s)/match(es) at the 2020 Paralympics?

*For example: cold towels, water spray, ice slushy, menthol*

- ☐ Yes
- ☐ No

**Display This Question:**

*If Did you use cooling strategies before or during (a) race(s)/match(es) at the 2020 Paralympics  
= Yes*

Please tick all cooling methods that you have used before and during (a) race(s)/match(es) at the 2020 Paralympics:

- Cooling before exercise is called *pre-cooling*, meaning cooling prior to the exercise.
- Cooling during exercise is called *per-cooling*, meaning cooling during the exercise.  
This includes cooling during breaks (for example, when subbing or during halftime).

|                                                            | <b><u>Before (a)</u><br/>race(s)/match(es)<br/><i>i.e. pre-cooling</i></b> | <b><u>During (a)</u><br/>race(s)/match(es)<br/><i>i.e. per-cooling</i></b> |
|------------------------------------------------------------|----------------------------------------------------------------------------|----------------------------------------------------------------------------|
|                                                            | Tick all that apply                                                        | Tick all that apply                                                        |
| Cold towel(s)                                              | <input type="radio"/>                                                      | <input type="radio"/>                                                      |
| Neck collar                                                | <input type="radio"/>                                                      | <input type="radio"/>                                                      |
| Ice bag(s)                                                 | <input type="radio"/>                                                      | <input type="radio"/>                                                      |
| Water spray on the face and/or neck                        | <input type="radio"/>                                                      | <input type="radio"/>                                                      |
| Water spray on the torso, arms and/or legs                 | <input type="radio"/>                                                      | <input type="radio"/>                                                      |
| Fanning                                                    | <input type="radio"/>                                                      | <input type="radio"/>                                                      |
| Evaporation vest (submerged in water)                      | <input type="radio"/>                                                      | <input type="radio"/>                                                      |
| Ice vest / PCM vest                                        | <input type="radio"/>                                                      | <input type="radio"/>                                                      |
| Whole-body cold water immersion                            | <input type="radio"/>                                                      | <input type="radio"/>                                                      |
| Cold water immersion of the hands                          | <input type="radio"/>                                                      | <input type="radio"/>                                                      |
| Cold water immersion of the legs                           | <input type="radio"/>                                                      | <input type="radio"/>                                                      |
| Cold water immersion of the feet                           | <input type="radio"/>                                                      | <input type="radio"/>                                                      |
| Cold beverage ingestion                                    | <input type="radio"/>                                                      | <input type="radio"/>                                                      |
| Ice-slurry ingestion                                       | <input type="radio"/>                                                      | <input type="radio"/>                                                      |
| Menthol mouth rinse                                        | <input type="radio"/>                                                      | <input type="radio"/>                                                      |
| Ethanol/menthol on the skin of the face and/or neck        | <input type="radio"/>                                                      | <input type="radio"/>                                                      |
| Ethanol/menthol on the skin of the torso, arms and/or legs | <input type="radio"/>                                                      | <input type="radio"/>                                                      |
| Other (please specify) _____                               | <input type="radio"/>                                                      | <input type="radio"/>                                                      |

*Display This Question:*

*If Did you use cooling strategies before or during (a) race(s)/match(es) at the 2020 Paralympics  
= Yes*

Did you use cooling strategies according to your plans made before the 2020 Tokyo Paralympics?

- ☐ Yes, it went according to plan
- ☐ No, it did not go according to plan

*Display This Question:*

*If Did you use cooling strategies according to your plans made before the 2020 Tokyo Paralympics?  
= No, it did not go according to plan.*

Why did your cooling strategies not go according to plan?

*For example:*

*Did you have access to your planned cooling strategies?*

*Did you need (more) cooling?*

How satisfied were you with your heat preparedness for the 2020 Paralympics? Please provide a score for both your heat acclimation strategy and cooling strategy, on a scale from 1 to 10 (0 = Not satisfied at all / 10 = Perfectly satisfied).

*Note: If you did not use heat acclimation or cooling, select "not applicable"*

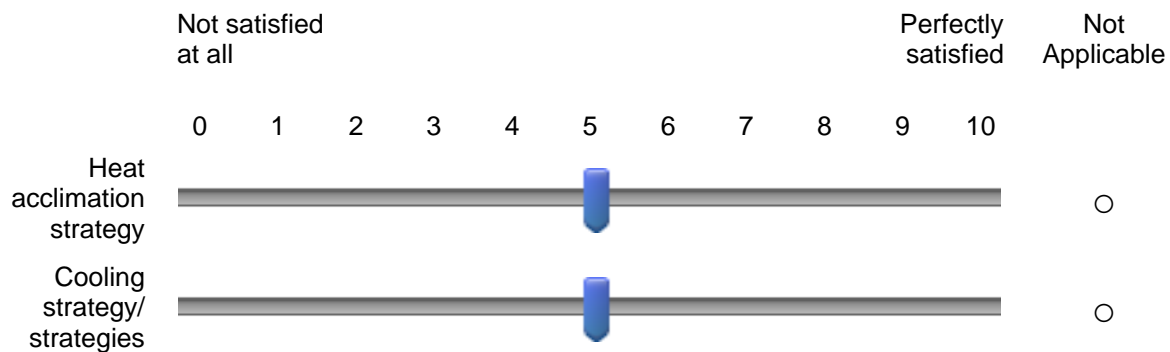

Please briefly explain the rating you gave for heat acclimation. Why were you (not) satisfied?

|  |
|--|
|  |
|--|

Please briefly explain the rating you gave for cooling. Why were you (not) satisfied?

|  |
|--|
|  |
|--|
