# Supplementary material
Source: publisher figshare collection journal article supplement (https://tandf.figshare.com/articles/dataset/_/21571840)
Supplement: Supplementary file 4 [file 1]

# Supplemental file 4

## *Ordinal and binary logistic regression outcomes*

---

### **Article title**

Heat preparedness and exertional heat illness in Paralympic athletes: A Tokyo 2020 survey

### **Authors**

Puck Alkemade<sup>1</sup>, Hein A. M. Daanen<sup>1</sup>, Thomas W. J. Janssen<sup>1</sup>, Elizabeth Broad<sup>2</sup>, Victoria L. Goosey-Tolfrey<sup>3</sup>, Tatsuru Ibusuki<sup>4</sup>, Hiske Kneepkens<sup>5</sup>, Julien D. Périard<sup>6</sup>, Thijs M. H. Eijsvogels<sup>7</sup>

### **Corresponding author**

Puck Alkemade, [puckalkemade@gmail.com](mailto:puckalkemade@gmail.com)

### **Author affiliations**

<sup>1</sup>Faculty of Behavioural and Movement Sciences, Vrije Universiteit Amsterdam, Amsterdam Movement Sciences, Amsterdam, The Netherlands.

<sup>2</sup>Freelance Sports Dietitian, Huskisson, Australia.

<sup>3</sup>Peter Harrison Centre for Disability Sport, School of Sport, Exercise and Health Sciences, Loughborough University, Loughborough, Leicestershire LE11 3TU, UK.

<sup>4</sup>Department of Rehabilitation Medicine, Akeno Central Hospital, Oita, Japan.

<sup>5</sup>Sport Medisch Centrum Papendal, NOC\*NSF, Arnhem, The Netherlands.

<sup>6</sup>University of Canberra Research Institute for Sport and Exercise, Bruce, Australia.

<sup>7</sup>Radboud Institute for Health Sciences, Department of Physiology, Radboud University Medical Center, Nijmegen, The Netherlands.

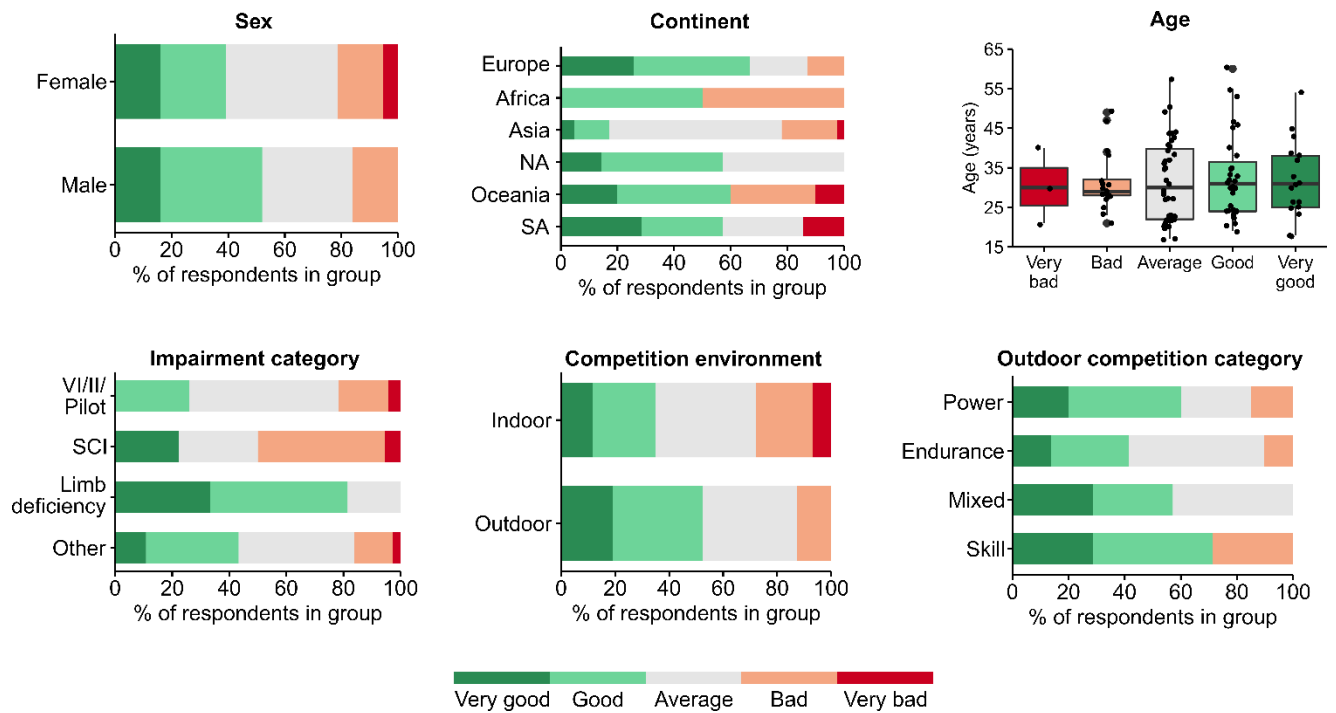

**Fig. 1** Self-rated heat-coping ability by participant groups. Abbreviations: NA, North-America; SA, South-America; VI, Visual impairment; II, Intellectual impairment; SCI, spinal cord injury.

**Table 1** Explanatory models for self-rated heat-coping ability, with participant characteristics as predictor variables. OR (95% CI), p-value and *n* respondents per group are presented. Abbreviations: OR, odds ratio; CI, confidence interval; Ref, reference group.

|                                      | <b>Self-rated heat coping ability</b>       |
|--------------------------------------|---------------------------------------------|
| <b>Sex</b>                           | <b><i>Ref: Female; n=56</i></b>             |
| Male                                 | OR=1.5 (0.7,3); p=0.3; n=50                 |
| <b>Age</b>                           | n=106                                       |
| <b>Continent</b>                     | <b><i>Ref: Europe; n=39</i></b>             |
| Africa                               | OR=0.2 (0,3.4); p=0.3; n=2                  |
| Asia                                 | OR=0.2 (0.1,0.5); <u>p&lt;0.001</u> ; n=41  |
| North-America                        | OR=0.8 (0.2,3.1); p=0.7; n=7                |
| Oceania                              | OR=0.4 (0.1,1.9); p=0.3; n=10               |
| South-America                        | OR=0.8 (0.2,3.8); p=0.8; n=7                |
| <b>Impairment category</b>           | <b><i>Ref: VI/II/Pilot; n=23</i></b>        |
| Spinal cord injury                   | OR=0.5 (0.2,1.7); p=0.3; n=18               |
| Limb deficiency                      | OR=8.9 (3.1,26.5); <u>p&lt;0.001</u> ; n=27 |
| Other                                | OR=1.9 (0.7,5); p=0.18; n=37                |
| <b>Competition environment</b>       | <b><i>Ref: Indoor; n=43</i></b>             |
| Outdoor                              | OR=2.2 (1.1,4.7); <u>p=0.03</u> ; n=63      |
| <b>Competition category, outdoor</b> | <b><i>Ref: Power; n=20</i></b>              |
| Endurance                            | OR=0.6 (0.2,1.8); p=0.4; n=29               |
| Mixed                                | OR=1.4 (0.3,6.7); p=0.7; n=7                |
| Skill                                | OR=1.3 (0.2,7); p=0.8; n=7                  |

**Table 2** Explanatory models for reported heat-related symptom occurrence in the past and in Tokyo, with participant characteristics as predictor variables. Percentage of “Yes”-responders, OR (95% CI), p-value and *n* respondents per group are presented. Abbreviations: OR, odds ratio; CI, confidence interval; Ref, reference group.

|                                      | Heat-related illness symptoms in the past (hot conditions) | Heat-related illness symptoms in Tokyo  |
|--------------------------------------|------------------------------------------------------------|-----------------------------------------|
| <b>Sex</b>                           | <b>Ref: Female; 58%. n=45</b>                              | <b>Ref: Female; 28%. n=29</b>           |
| Male                                 | 60%. OR=1.1 (0.5,2.5); p=0.9; n=47                         | 12%. OR=0.4 (0.1,1.7); p=0.2; n=24      |
| <b>Age</b>                           | OR=1 (0.9, 1.); p=0.6; n = 92                              | OR=1 (0.9, 1); p=0.2; n=53              |
| <b>Continent</b>                     | <b>Ref: Europe; 53%. n=34</b>                              | <b>Ref: Europe; 19%. n=21</b>           |
| Africa                               | 50%. OR=0.9 (0,16.3); p=0.9; n=2                           | -                                       |
| Asia                                 | 62%. OR=1.4 (0.5,3.8); p=0.5; n=34                         | 5%. OR=0.2 (0,2.4); p=0.2; n=19         |
| North-America                        | 71%. OR=2.2 (0.4,13.6); p=0.4; n=7                         | 33%. OR=2.1 (0.1,31.3); p=0.6; n=3      |
| Oceania                              | 78%. OR=3.1 (0.5,17.8); p=0.2; n=9                         | 43%. OR=3.2 (0.5,21.1); p=0.2; n=7      |
| South-America                        | 33%. OR=0.4 (0.1,2.9); p=0.4; n=6                          | 67%. OR=8.5 (0.6,125.2); p=0.1; n=3     |
| <b>Impairment category</b>           | <b>Ref: VI/II/Pilot; 45%. n=20</b>                         | <b>Ref: VI/II/Pilot; 10%. n=10</b>      |
| Spinal cord injury                   | 76%. OR=4 (0.9,17); <u>p=0.058</u> ; n=17                  | 30%. OR=3.9 (0.3,47.9); p=0.3; n=10     |
| Limb deficiency                      | 46%. OR=1 (0.3,3.5); p>0.9; n=24                           | <b>0%. OR=0 (0,Inf); p&gt;0.9; n=12</b> |
| Other                                | 70%. OR=2.9 (0.9,9.5); p=0.1; n=30                         | 35%. OR=4.8 (0.5,48.7); p=0.2; n=20     |
| <b>Competition environment</b>       | <b>Ref: Indoor; 54%. n=37</b>                              | <b>Ref: Indoor; 30%. n=20</b>           |
| Outdoor                              | 62%. OR=1.4 (0.6,3.3); p=0.5; n=55                         | 15%. OR=0.4 (0.1,1.7); p=0.2; n=33      |
| <b>Competition category, outdoor</b> | <b>Ref: Power; 67%. n=18</b>                               | <b>Ref: Power; 12%. n=8</b>             |
| Endurance                            | 62%. OR=0.8 (0.2,3.1); p=0.8; n=24                         | 19%. OR=1.6 (0.1,19.5); p=0.7; n=16     |
| Mixed                                | 57%. OR=0.7 (0.1,4.1); p=0.7; n=7                          | <b>0%. OR=0 (0,Inf); p&gt;0.9; n=5</b>  |
| Skill                                | 50%. OR=0.5 (0.1,3.4); p=0.5; n=6                          | 25%. OR=2.3 (0.1,54.3); p=0.6; n=4      |

**Table 3** Explanatory models for heat acclimation use in the past and in Tokyo, with participant characteristics as predictor variables. Percentage of “Yes”-responders, OR (95% CI), p-value and *n* respondents per group are presented. Abbreviations: OR, odds ratio; CI, confidence interval; Ref, reference group.

|                                      | Heat acclimation use in the past                         | Heat acclimation use in Tokyo                             |
|--------------------------------------|----------------------------------------------------------|-----------------------------------------------------------|
| <b>Sex</b>                           | <b>Ref: Female; 35%. <i>n</i>=55</b>                     | <b>Ref: Female; 57%. <i>n</i>=54</b>                      |
| Male                                 | 56%. OR=2.4 (1.1,5.4); <u>p=0.03</u> ; <i>n</i> =50      | 58%. OR=1 (0.5,2.3); p=0.9; <i>n</i> =48                  |
| <b>Age</b>                           | OR=1 (1, 1.1); p=0.1; <i>n</i> =105                      | OR=1 (1, 1.1); p=0.3; <i>n</i> =102                       |
| <b>Continent</b>                     | <b>Ref: Europe; 46%. <i>n</i>=39</b>                     | <b>Ref: Europe; 58%. <i>n</i>=36</b>                      |
| Africa                               | 50%. OR=1.2 (0.1,21.2); p=0.9; <i>n</i> =2               | 50%. OR=0.7 (0,13.1); p=0.8; <i>n</i> =2                  |
| Asia                                 | 38%. OR=0.7 (0.3,1.7); p=0.4; <i>n</i> =40               | 55%. OR=0.9 (0.3,2.2); p=0.8; <i>n</i> =40                |
| North-America                        | 43%. OR=0.9 (0.2,4.6); p=0.9; <i>n</i> =7                | 71%. OR=1.8 (0.3,10.9); p=0.5; <i>n</i> =7                |
| Oceania                              | 90%. OR=10.5 (1.2,95.1); <u>p=0.03</u> ; <i>n</i> =10    | 80%. OR=2.9 (0.5,15.9); p=0.2; <i>n</i> =10               |
| South-America                        | 14%. OR=0.2 (0,1.9); p=0.1; <i>n</i> =7                  | 29%. OR=0.3 (0,1.7); p=0.2; <i>n</i> =7                   |
| <b>Impairment category</b>           | <b>Ref: VI/II/Pilot; 45%. <i>n</i>=22</b>                | <b>Ref: VI/II/Pilot; 40%. <i>n</i>=20</b>                 |
| Spinal cord injury                   | 44%. OR=1 (0.3,3.4); p=0.9; <i>n</i> =18                 | 61%. OR=2.4 (0.6,8.9); p=0.2; <i>n</i> =18                |
| Limb deficiency                      | 59%. OR=1.7 (0.5,5.6); p=0.3; <i>n</i> =27               | 67%. OR=3 (0.9,10.2); p=0.1; <i>n</i> =27                 |
| Other                                | 35%. OR=0.7 (0.2,2); p=0.4; <i>n</i> =37                 | 58%. OR=2.1 (0.7,6.5); p=0.2; <i>n</i> =36                |
| <b>Competition environment</b>       | <b>Ref: Indoor; 21%. <i>n</i>=43</b>                     | <b>Ref: Indoor; 26%. <i>n</i>=42</b>                      |
| Outdoor                              | 61%. OR=6 (2.4,14.9); <u>p&lt;0.001</u> ; <i>n</i> =62   | 80%. OR=11.3 (4.3,29.3); <u>p&lt;0.001</u> ; <i>n</i> =60 |
| <b>Competition category, outdoor</b> | <b>Ref: Power; 75%. <i>n</i>=20</b>                      | <b>Ref: Power; 79%. <i>n</i>=19</b>                       |
| Endurance                            | 50%. OR=0.3 (0.1,1.2); p=0.1; <i>n</i> =28               | 78%. OR=0.9 (0.2,4); p=0.9; <i>n</i> =27                  |
| Mixed                                | 100%. OR=1.4·10 <sup>7</sup> (0,Inf); p>0.9; <i>n</i> =7 | 86%. OR=1.6 (0.1,18.3); p=0.7; <i>n</i> =7                |
| Skill                                | 29%. OR=0.1 (0,1); <u>p=0.04</u> ; <i>n</i> =7           | 86%. OR=1.6 (0.1,18.3); p=0.7; <i>n</i> =7                |

**Table 4** Explanatory models for cooling use in the past and in Tokyo, with participant characteristics as predictor variables. Percentage of “Yes”-responders, OR (95% CI), p-value and *n* respondents per group are presented. Abbreviations: OR, odds ratio; CI, confidence interval; Ref, reference group.

|                                      | Cooling use in the past                                           | Cooling use in Tokyo                                               |
|--------------------------------------|-------------------------------------------------------------------|--------------------------------------------------------------------|
| <b>Sex</b>                           | <b>Ref: Female; 64%. <i>N</i>=53</b>                              | <b>Ref: Female; 82%. <i>n</i>=45</b>                               |
| Male                                 | 68%. OR=1.2 (0.5,2.7); <i>p</i> =0.7; <i>n</i> =50                | 72%. OR=0.6 (0.2,1.6); <i>p</i> =0.3; <i>n</i> =43                 |
| <b>Age</b>                           | OR=1 (1, 1); <i>p</i> >0.9; <i>n</i> =103                         | OR=1 (1, 1.1); <i>p</i> =0.1; <i>n</i> =88                         |
| <b>Continent</b>                     | <b>Ref: Europe; 62%. <i>n</i>=39</b>                              | <b>Ref: Europe; 82%. <i>n</i>=28</b>                               |
| Africa                               | 50%. OR=0.6 (0,11.4); <i>p</i> =0.7; <i>n</i> =2                  | 100%. OR=2.5·10 <sup>7</sup> (0, Inf); <i>p</i> >0.9; <i>n</i> =2  |
| Asia                                 | 72%. OR=1.6 (0.6,4.3); <i>p</i> =0.3; <i>n</i> =40                | 72%. OR=0.6 (0.2,1.9); <i>p</i> =0.3; <i>n</i> =39                 |
| North-America                        | 50%. OR=0.6 (0.1,3.6); <i>p</i> =0.6; <i>n</i> =6                 | 50%. OR=0.2 (0,1.5); <i>p</i> =0.1; <i>n</i> =6                    |
| Oceania                              | 100%. OR=2.7·10 <sup>7</sup> (0,Inf); <i>p</i> >0.9; <i>n</i> =10 | 100%. OR=2.5·10 <sup>7</sup> (0, Inf); <i>p</i> >0.9; <i>n</i> =10 |
| South-America                        | 17%. OR=0.1 (0,1.2); <i>p</i> =0.1; <i>n</i> =6                   | 67%. OR=0.4 (0,6.1); <i>p</i> =0.5; <i>n</i> =3                    |
| <b>Impairment category</b>           | <b>Ref: VI/II/Pilot; 59%. <i>n</i>=22</b>                         | <b>Ref: VI/II/Pilot; 61%. <i>n</i>=18</b>                          |
| Spinal cord injury                   | 72%. OR=1.8 (0.5,7); <i>p</i> =0.4; <i>n</i> =18                  | 81%. OR=2.8 (0.6,13.7); <i>p</i> =0.2; <i>n</i> =16                |
| Limb deficiency                      | 68%. OR=1.5 (0.4,5); <i>p</i> =0.5; <i>n</i> =25                  | 71%. OR=1.5 (0.4,5.8); <i>p</i> =0.5; <i>n</i> =24                 |
| Other                                | 65%. OR=1.3 (0.4,3.9); <i>p</i> =0.7; <i>n</i> =37                | 90%. OR=5.5 (1.2,26.1); <u><i>p</i>=0.03</u> ; <i>n</i> =29        |
| <b>Competition environment</b>       | <b>Ref: Indoor; 46%. <i>n</i>=41</b>                              | <b>Ref: Indoor; 58%. <i>n</i>=31</b>                               |
| Outdoor                              | 79%. OR=4.4 (1.8,10.6); <u><i>p</i>&lt;0.001</u> ; <i>n</i> =62   | 88%. OR=5.2 (1.7,15.3); <u><i>p</i>=0.003</u> ; <i>n</i> =57       |
| <b>Competition category, outdoor</b> | <b>Ref: Power; 80%. <i>n</i>=20</b>                               | <b>Ref: Power; 82%. <i>n</i>=17</b>                                |
| Endurance                            | 79%. OR=0.9 (0.2,3.9); <i>p</i> =0.9; <i>n</i> =28                | 89%. OR=1.7 (0.3,10); <i>p</i> =0.5; <i>n</i> =27                  |
| Mixed                                | 100%. OR=1.1·10 <sup>7</sup> (0, Inf); <i>p</i> >0.9; <i>n</i> =7 | 100%. OR=2.5·10 <sup>7</sup> (0, Inf); <i>p</i> >0.9; <i>n</i> =7  |
| Skill                                | 57%. OR=0.3 (0.1,2.2); <i>p</i> =0.2; <i>n</i> =7                 | 83%. OR=1.1 (0.1,13.5); <i>p</i> >0.9; <i>n</i> =6                 |

**Table 5** Explanatory models strategy use in Tokyo, with EHI symptom history as predictor variables. Percentage of “Yes”-responders, OR (95% CI), p-value and *n* respondents per group are presented. Abbreviations: OR, odds ratio; CI, confidence interval; Ref, reference group.

|                                                  | Heat acclimation use in Tokyo                      | Cooling use in Tokyo                               |
|--------------------------------------------------|----------------------------------------------------|----------------------------------------------------|
| <b>Heat-related illness symptoms in the past</b> | <b>Ref: No; 44%. <i>n</i>=36</b>                   | <b>Ref: No; 60%. <i>n</i>=30</b>                   |
| Yes                                              | 66%. OR=2.4 (1.5,9); <u>p=0.045</u> ; <i>n</i> =53 | 86%. OR=4 (1.3,12.1); <u>p=0.01</u> ; <i>n</i> =49 |

**Table 6** Explanatory models for heat-related symptom occurrence in Tokyo, with strategy use in Tokyo as predictor variables. Percentage of “Yes”-responders, OR (95% CI), p-value and *n* respondents per group are presented. Abbreviations: OR, odds ratio; CI, confidence interval; Ref, reference group.

|                                      | Heat-related illness symptoms in Tokyo                    |
|--------------------------------------|-----------------------------------------------------------|
| <b>Heat acclimation use in Tokyo</b> | <b>Ref: No; 14%. <i>n</i>=21</b>                          |
| Yes                                  | 25%. OR=2 (0.5,8.9); p=0.4; <i>n</i> =32                  |
| <b>Cooling use in Tokyo</b>          | <b>Ref: No; 0%. <i>n</i>=11</b>                           |
| Yes                                  | 19%. OR=2.7·10 <sup>7</sup> (0, Inf); p>0.9; <i>n</i> =36 |
